# Supplementary material for: MoS2-Cu/CuO@graphene Heterogeneous Photocatalysis for Enhanced Photocatalytic Degradation of MB from Water
Source: Polymers (Basel). 2022 Aug 10;14(16):3259. doi: 10.3390/polym14163259 (PMC9414561; doi:10.3390/polym14163259)
Supplement: Supplementary file 1 [file polymers-14-03259-s001.zip › polymers-1800215-supplementary.pdf]

# MoS<sub>2</sub>-Cu/CuO@graphene heterogeneous photocatalysis for enhanced photocatalytic degradation of MB from water

Asim Jilani <sup>1\*</sup> Ammar A Melaibari <sup>1,2</sup>

<sup>1</sup> Center of Nanotechnology, King Abdulaziz University, 21589, Jeddah, Saudi Arabia

<sup>2</sup> Department of Mechanical Engineering, King Abdulaziz University, Jeddah, Saudi Arabia

\* Correspondence: asim.jilane@gmail.com, ajilani@kau.edu.sa

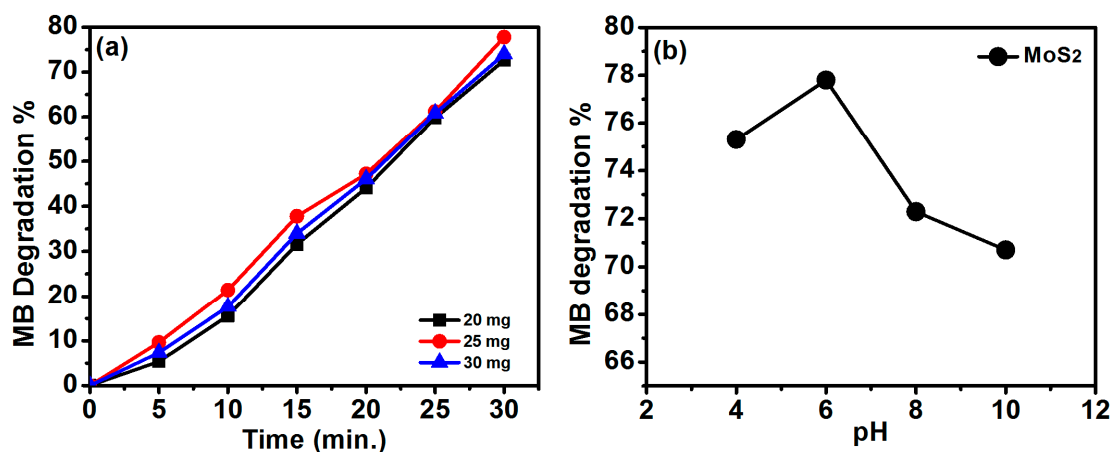

**Figure S1.** (a) Degradation of MB under the different concentration MoS<sub>2</sub> (b) Degradation of optimized 25 mg of MoS<sub>2</sub> at various pH within the 30 minutes

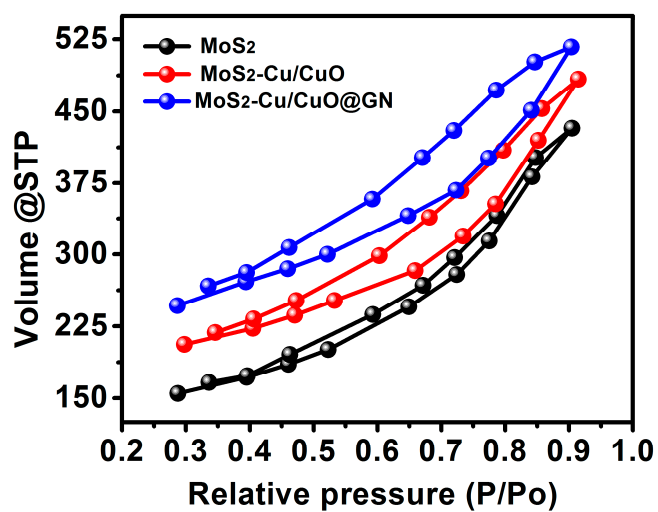

**Figure S2.** BET specific surface area of MoS<sub>2</sub> , MoS<sub>2</sub>-Cu/CuO MoS<sub>2</sub>-Cu/CuO @GN
